# Supplementary material for: Developing literature review writing and citation practices through an online writing tutorial series: Corpus-based evidence
Source: Frontiers journal article supplement (doi:10.3389/fcomm.2023.1035394), 2023-03-02
Supplement: Data_Sheet_1.docx [file Data_Sheet_1.docx]

Supplementary material: Annotated writing samples on the individual writing tasks from a participant

This is a collection of writing samples on three individual writing tasks, contributed by a Vietnamese-speaking graduate student.

The samples are annotated as follows. Citation instances are enclosed with square brackets and stance features, including reporting verbs, boosters, and hedges are bolded. The items from AWL (Academic Word List) items and AFL (Academic Formulas List) are underscored. Basic connectives (i.e., ‘for’, ‘and’, ‘nor’, ‘but’, ‘or’, ‘yet’, and ‘so’) are highlighted in yellow.

Task 1 (Word count: 780, excluding references)

Effects of Cannabis Legalization on Human Health

*Introduction*

[According to SA Health (2017), cannabis (often called marijuana) comes from the cannabis plant.] It includes the Tetrahydrocannabinol (THC) active ingredient delta-9, which affects brain function. Cannabis’s flowers and leaves are dried, then smoked or consumed due to the psychoactive effects of THC, which may alter perception and mood.

The surge of legalization and liberalization proposals has led to abundant political discussions on the possible dangers and benefits of cannabis usage as a backdrop. Several states have enacted laws legalizing cannabis for adult recreational use, and also restrict the use of cannabis for medicinal purposes. These policy changes will have a wide range of adverse effects, with significant and enduring consequences for the health and social systems. The use of cannabis is one of many interacting variables that can impact brain growth and mental function. The literature was then analyzed to determine the impact of cannabis use on perception and psychosis in humans.

*Cannabis Effects on Mental Health*

1. Psychosis and Schizophrenia

[Previous research, including major assessments by the World Health Organization (WHO, 2016) and the National Academies of Science, Engineering and Medicine (NASEM, 2017), have **identified** strong evidence which shows that the most frequent users of cannabis are at the highest risk of developing schizophrenia or other forms of psychosis.] Recent research indicates that, relative to people who have never used marijuana, smoking high-powered cannabis every day may raise the risk of developing psychosis by almost five times. The dose-response association between the frequency of cannabis use at the age of 18 and the risk of schizophrenia was established in a follow-up study. [The researchers **calculated** that if no one in the cohort had used cannabis, 13 percent of schizophrenia cases **would** have been averted (Zammit et al., 2002).] These results have been replicated repeatedly and worldwide.

2. Depression, Anxiety, and Suicide

Increasing rates of depression, anxiety and suicide are associated with cannabis use. [Groce (2018) and Lev-Ran et al (2013) **found** that there is a mild statistical correlation between the use of cannabis and an increased risk of developing depressive disorders.] [A statistical correlation between frequent cannabis use and an increased occurrence of social anxiety disorder (Kedzior and Laeber, 2014), suicidal ideation and suicide attempts has also been moderately **demonstrated** (Borges et al., 2016).] [Similar outcomes for depression, anxiety, and suicide are also seen in data **analyzed** by WHO (2016).] [**Recognizing** that reverse causation and shared risk factors cannot be excluded as reasons for these statistical correlations, both the NASEM (2017) and the WHO (2016) reviews **agree** that more study is required.]

3. Link to Other Substance Abuse

Use of other illicit drugs has also been linked to cannabis use. There is evidence of a statistical correlation between the use of cannabis and the development of opioid dependency and/or substance abuse disorder for alcohol, tobacco, and illegal drugs, according to the NASEM study. These findings have been shown by several cohort studies. While several studies have shown that medicinal cannabis has contributed to changes in opioid-related fatalities, there has been a rise in opioid and methamphetamine overdose and deaths in recent years.

*Conclusion*

The legalization of cannabis has contributed to major health implications. [The **most** concerning include “psychosis, suicide, and other substance abuse” (Roberts, 2019).] Medical advice that could be detrimental to patients is provided by Cannabis dispensary staff without medical training. Given these considerations, when and how to decriminalize or legalize non-medical cannabis use should be carefully examined by many states.

[Present attempts to normalize the use of cannabis are being primarily driven by “a combination of grassroots activism, pharmacological ingenuity, and private profiteering, with a worrisome disregard for scientific evidence, gaps in our knowledge, or the possibility of unintended consequences” (Dr. Volkow, 2016, p.295).] It is important to explain which aspects of exposure to cannabis (e.g. age at onset, quantity used, frequency of use, length of use and potency of cannabis used) pose the greatest risk to the development of cannabis use disorder or other adverse effects (e.g. cognitive deficits, lack of motivation, or psychosis). There are, however, many unanswered questions more specifically related to the soundness of policies that have been hastily introduced. Will ads be allowed, for instance? How will the growth of the pool of pregnant cannabis consumers impact the trajectories of exposed fetuses' development? Finally, what are the effects of smoking second-hand cannabis?

The areas discussed in this article represent only a subset of the various health consequences of the use of cannabis. Therefore, we should strive to learn as much and as quickly as we can from the ongoing changes in local policy to mitigate the damage and optimize the future benefits, in addition to enhancing our basic research efforts.

References

Borges, G., Bagge, C., & Orozco, R. (2016). A literature review and meta-analyses of cannabis use and suicidality. *Journal Of Affective Disorders*, 195, 63-74. <https://doi.org/10.1016/j.jad.2016.02.007>

Groce, E. (2018). The Health Effects of Cannabis and Cannabinoids: The Current State of Evidence and Recommendations for Research. *Journal of Medical Regulation*, 104(4), 32-32. <https://doi.org/10.30770/2572-1852-104.4.32>

Kedzior, K., & Laeber, L. (2014). A positive association between anxiety disorders and cannabis use or cannabis use disorders in the general population- a meta-analysis of 31 studies. BMC Psychiatry, 14(1). <https://doi.org/10.1186/1471-244x-14-136>

Lev-Ran, S., Roerecke, M., Le Foll, B., George, T., McKenzie, K., & Rehm, J. (2013). The association between cannabis use and depression: a systematic review and meta-analysis of longitudinal studies. *Psychological Medicine*, 44(4), 797-810. <https://doi.org/10.1017/s0033291713001438>

National Academies of Sciences, Engineering, and Medicine (NASEM). (2017). *Health Effects of Marijuana and Cannabis-Derived Products Presented in New Report*. Retrieved from https://www.nationalacademies.org/news/2017/01/health-effects-of-marijuana-and-cannabis-derived-products-presented-in-new-report

Roberts, B. (2019). Legalized Cannabis in Colorado Emergency Departments: A Cautionary Review of Negative Health and Safety Effects. *Western Journal of Emergency Medicine*, 20(4), 557-572. <https://doi.org/10.5811/westjem.2019.4.39935>

SA Health. (2017). *What is cannabis*. Retrieved from https://www.sahealth.sa.gov.au/wps/wcm/connect/eeb691004f50b5aeaccfed330cda8a00/What+is+cannabis+%2800499%29+2017.pdf?MOD=AJPERES&amp;CACHEID=ROOTWORKSPACE-eeb691004f50b5aeaccfed330cda8a00-niReelo

Volkow, N., Swanson, J., Evins, A., DeLisi, L., Meier, M., & Gonzalez, R. et al. (2016). Effects of Cannabis Use on Human Behavior, Including Cognition, Motivation, and Psychosis: A Review. *JAMA Psychiatry*, 73(3), 292. https://doi.org/10.1001/jamapsychiatry.2015.3278

World Health Organization (WHO). (2016). *The health and social effects of nonmedical cannabis use*. Retrieved from https://www.who.int/substance_abuse/publications/cannabis_report/en/

Zammit, S. (2002). Self-reported cannabis use as a risk factor for schizophrenia in Swedish conscripts of 1969: historical cohort study. *BMJ*, 325(7374), 1199-1199. <https://doi.org/10.1136/bmj.325.7374.1199>

Task 3 (word count: 815)

Pros and Cons of Online Learning

With the rapid advancement of Internet technology, online learning has attracted the interest of both schools and private companies, as well as government agencies. [Furthermore, the extreme outbreak of Corona Virus disease provides yet another argument in favor of online learning, namely, that online learning serves as a panacea during this time (Dhawan, 2020).] [As can be seen, in the twenty-first century, widespread expansion of Internet access, availability of various e-applications, new devices, and so on pushed educational institutions to go online (Rahman, 2021).] [The online learning system is now being commonly used by different sectors of the university, allowing students to learn whenever and wherever they choose, without being constrained by space or time. (Hiranrithikorn, 2019).] Thus, the purpose of this literature review is to point out the advantages and disadvantages of online learning.

*The advantages of online learning*

The attribute of convenience is cited as the most significant benefit of online learning. Since there are not rigid class schedules, students can choose when to join a specific study unit and can normally personalize their learning schedule to a large extent. Students can self-regulate the pace of their learning and progress according to their skills and abilities. If available, students can choose such types of study materials that match their learning styles, competency levels and personal interests. Students can monitor their own learning speed and success based on their skills and abilities. Students should choose study materials that are appropriate for their learning styles, competency levels, and personal interests if they are available. [Furthermore, a number of teachers and students reflected on their ability to concentrate more on the course material and less on issues such as parking, traffic, and other issues that could occur in a typical classroom setting (Thomson, 2010).] Teachers may also provide general guidelines and deadlines to be followed; however, students are responsible for the rest of the course time management. Moreover, the ease of online learning allows for quick communication with teachers and classmates in the virtual classroom.

Students and teachers can take advantage of the ability to freely exchange knowledge and collaborate on a variety of topics and projects by using online technology. Text-based online networking (chats, forums, etc.) can help people overcome their shyness and awkwardness in social situations. Furthermore, as students have more time to think about and possibly post-edit individual questions, remarks, and other contributions, they appear to react better. In addition, the use of e-tools greatly aids in the development of students' digital intelligence and IT skills in general. [Last, but not least, reductions in a variety of expenses (travel, printing, buying books, etc.) **should** also be taken into account when considering the overall implications of installing selected e-learning solutions (Zounek & Sudicky, 2012).]

*The disadvantages of online learning*

Online learning may also cause negative resentments with students who lack sufficient motivation and the ability to organize workload and learn independently. [Obviously, students who lacked self-control did not allot enough time to complete assignments, therefore turning in low-quality work or late submissions (You and Kang, 2014).] [As a result, students who lacked independence and self-motivation fared worse than their peers in terms of academic success (Savenye, 2005).] Furthermore, students may feel isolated and abandoned in the virtual environment, particularly when there is no face-to-face instruction or other forms of offline interaction for an extended period of time (e.g. in distance education programs).

Although appropriate technologies are present and available, students may lack the necessary knowledge and skills to effectively use them to improve their learning experiences. Another issue with the telecommunications system and other resources required to transmit successfully is transmission quality. [Although two-way communication capabilities may be available, if the quality is poor, distractions and frustrations **can** result, making it difficult to follow the instruction both audibly and visually, and students **may** lose interest (Fedynich, 2013).]

Some students are put off by the amount of reading and writing required in online courses. [The heavy text and writing curriculum may be difficult for students with low reading abilities (Donlevy, 2003).] Finally, online education raises some health concerns, primarily related to long periods of time spent working with computers. [Eye strain, back pain, a lack of mobility, and even mental disorders may be listed among the major considerations (Zounek & Sudicky, 2012).]

*Conclusion*

The literature review discusses the advantages and disadvantages of online learning for students. Despite some drawbacks, online courses are an excellent way for students to broaden their educational opportunities and stay competitive in the ever-competitive field of education during this pandemic. Students who pursue higher education through online coursework must be self-motivated, self-reliant, and responsible students. Online courses rely heavily on communication between instructors and students in the form of encouraging remarks, constructive criticism, and timely feedback. Overall, online learning environments enable students to learn in an environment that is not constrained by place or time.

References

Dhawan, S. (2020). Online Learning: A Panacea in the Time of COVID-19 Crisis. *Journal of Educational Technology Systems*, 49(1), 5–22. <https://doi.org/10.1177/0047239520934018>

Fedynich, L. V. (2013). Teaching beyond the classroom walls: The pros and cons of cyber learning. *Journal of Instructional Pedagogies*, 13.

Hiranrithikorn, P. (2019). Advantages and Disadvantages of Online Learning. Icbtsproceeding.ssru.ac.th. Retrieved 2 March 2021, from <http://icbtsproceeding.ssru.ac.th/index.php/ICBTSBERLIN2019/article/view/628>.

Rahman, A. (2021). Using Students’ Experience to Derive Effectiveness of COVID-19-Lockdown-Induced Emergency Online Learning at Undergraduate Level: Evidence from Assam, India. *Higher Education for The Future*, 8(1), 71-89. <https://doi.org/10.1177/2347631120980549>

Savenye, W.C. (2005). Improving Online Courses: What is Interaction and Why Use It? (Undetermined). *Distance Learning*, 2(6), 22-28.

Thomson, L. D. (2010). Beyond the Classroom Walls: Teachers’ and Students’ Perspectives on How Online Learning Can Meet the Needs of Gifted Students. *Journal of Advanced Academics*, 21(4), 662-712. <http://joa.sagepub.com.pluma.sjfc.edu/content/21/4/662.full.pdf+html>

You, J. W., & Kang, M. (2014) The role of academic emotions in the relationship between perceived academic control and self-regulated learning in online learning. *Computers & Education*, 77, 125-133

Zounek, J., & Sudicky, V. (2012). Heads in the cloud: Pros and Cons of online learning. *E-learning: Learning with online technologies*.

Task 5 (word count: 727)

A Brief of Pacifism in Japan

Japan is one of the countries that are often reminded of pacifism, transitioned from militaristic to pacifistic and now again turning to militaristic. During World War II, Japan was militaristic. But after being bombed by the US on two big cities and occupied many places, Japan was forced to abide by a pacifism which later brought many benefits. Today, however, under threats from neighboring countries like China and North Korea, Japan seems to revert to militarism. This dilemma - keeping peace among militaristic neighbors - will be discussed in this paper.

Pacifism is a commitment to peace and opposition to war. [As **indicated** by Fiala (2006), the word ‘pacifism’ is derived from the word ‘pacific’, which means peace making.] The modern understanding of the word ‘pacifism’ dates back to 1901 when Émile Artaud employed the French term ‘pacifisme’. [As **stated** by Holmes (2006), pacifism is defined as a commitment to nonviolence, or at the very least, a commitment to avoid unjustified intentional injury.] [According to pacifists causing harm to others intentionally is unjustifiable (p.163).] [However, the concept of nonviolence **could** be expanded to include the idea of managing tumultuous and intense emotions (Fiala, 2006).] Pacifism is generally understood to be a principled rejection of war and killing. [Surprisingly, pacifist terminology has been used to describe a pragmatic commitment to using war to bring about peace (Narveson, 2018).]

Japan prides itself on being a peace-loving nation. [The majority of Japanese people are proud to be citizens of a "peaceful and industrialized country" that has "risen from the ashes like a phoenix" (McVeigh, 2006, p.125).] Japanese pacifism, as the country's primary source of national honor, is situated within an unresolved entanglement of present glory and past shame. [The atomic bombings in Hiroshima and Nagasaki served as the historical precursor of Japan's anti-nuclear pacifism, while postwar Japan emerged as a world economic power benefiting from an externally imposed pacifist ideology (Kim, 2018).] Japan’s pacifist debates are **often** raised from a practical political perspective. [Realists **argue** that the United States’ nuclear umbrella is the nation's economic savior, and that the Peace Constitution is the world's bulletproof shield (Orr, 2002).] To put it another way, pacifism brings economic prosperity, and Japan has reaped the benefits of victimhood. Even during times of regional and international instability and tension, the majority of Japanese citizens continued to support this policy. Pacifism could have given Japan widespread positive recognition and status because many other countries claim to be "peace-loving".

[Japan’s pacifism, despite its apparent success and potential, has **never** been a model that has attracted imitators (Gustafsson et al, 2019).] The majority of previous research has dismissed Japan's pacifism as a fanciful and unsustainable anomaly. This dominant line of research sees recent changes in Japan's security environment - a rising China and a belligerent North Korea - as having led Japan to realize what they've known all along. Pacifism is being phased out in favor of what is known as the normal state model, which is seen as realistic and natural. [This is ironic, because the normal state model's policies appear to be posing a security threat to East Asia already (Liff & Ikenberry, 2014).] [Both Japan and China are acting in accordance with the normal state model, ensuring that they are "nation[s] that can go to war," by increasing their military preparedness, ostensibly in response to each other (Samuels, 2007, p.111).] Thus, is the pacifist model on its deathbed? [In fact, the pacifist model **must** be compared to the currently dominant model—and the latter **must** be recognized as such—in order to fully comprehend its future potential (Gustafsson et al, 2019).] If a pacifist model were to replace the normal state model, it is plausible that the former would produce less war and human suffering.

[In conclusion, despite its history, which dates back **almost** a century, Japan has taken a more pragmatic stance since then and continues to be a proven, pacifistic country, one of the few that has learned from its militaristic past (Gustafsson et al, 2018).] Japan has stepped away from war and now relies solely on its military to defend its people. [Passive pacifism, on the other hand, works best when the security climate is relatively benevolent (Sidaras, 2018, p.40).] Thus, Japan will need to improve its defenses as threats in the Indo-Pacific area rise.

References

Holmes, R. L. (2016). *Pacifism: A philosophy of nonviolence*. Bloomsbury Publishing.

Narveson, J. (2018). Pacifism: Does it make moral sense? In A. Fiala (Ed.), (1st ed., pp. 191-198). Routledge. <https://doi.org/10.4324/9781315638751-17>

Fiala, A. (2006), Pacifism, The Stanford Encyclopedia of Philosophy (Fall 2018 Edition), Edward N. Zalta (ed.). Retrieved from <https://plato.stanford.edu/archives/fall2018/entries/pacifism/>

McVeigh, B. J. (2006). *Nationalisms of Japan: Managing and mystifying identity*. Lanham and Boulder: Rowan and Littlefield Publishers.

Orr, J. J. (2002), *The Victim as Hero: Ideologies of Peace and National Identity in Postwar Japan,* Honolulu: University of Hawaii

Kim, M. (2008). Pacifism or Peace Movement?: Hiroshima Memory Debates and Political Compromises. *Journal of International and Area Studies*, 61-78.

Gustafsson, K., Hagström, L., & Hanssen, U. (2018). Japan's Pacifism Is Dead. *Survival*, 60(6), 137-158.

Gustafsson, K., Hagström, L., & Hanssen, U. (2019). Long live pacifism! Narrative power and Japan’s pacifist model. *Cambridge Review of International Affairs*, 32(4), 502-520.

Liff, A. P., & Ikenberry, G. J. (2014). Racing toward tragedy?: China's rise, military competition in the Asia Pacific, and the security dilemma. *International Security*, 39(2), 52-91.

Samuels, R. J. (2011). *Securing Japan: Tokyo's grand strategy and the future of East Asia*. Cornell University Press.

Sidaras, G. E. (2018). From Militarism to Pacifism: Understanding the Need to Revise Japan's Article 9. NATIONAL DEFENSE UNIV NORFOLK VA NORFOLK United States.
